# Supplementary material
Source: PubMed Central journal article supplement (PMC4498954)

## Supplementary Figures

Supplementary Figure 1:

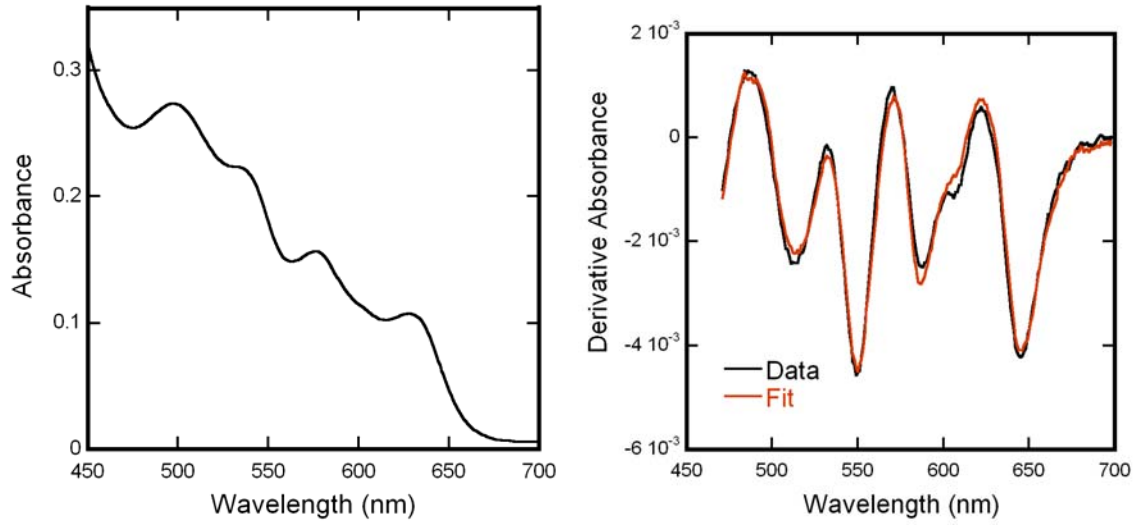

Supplementary Figure 2:

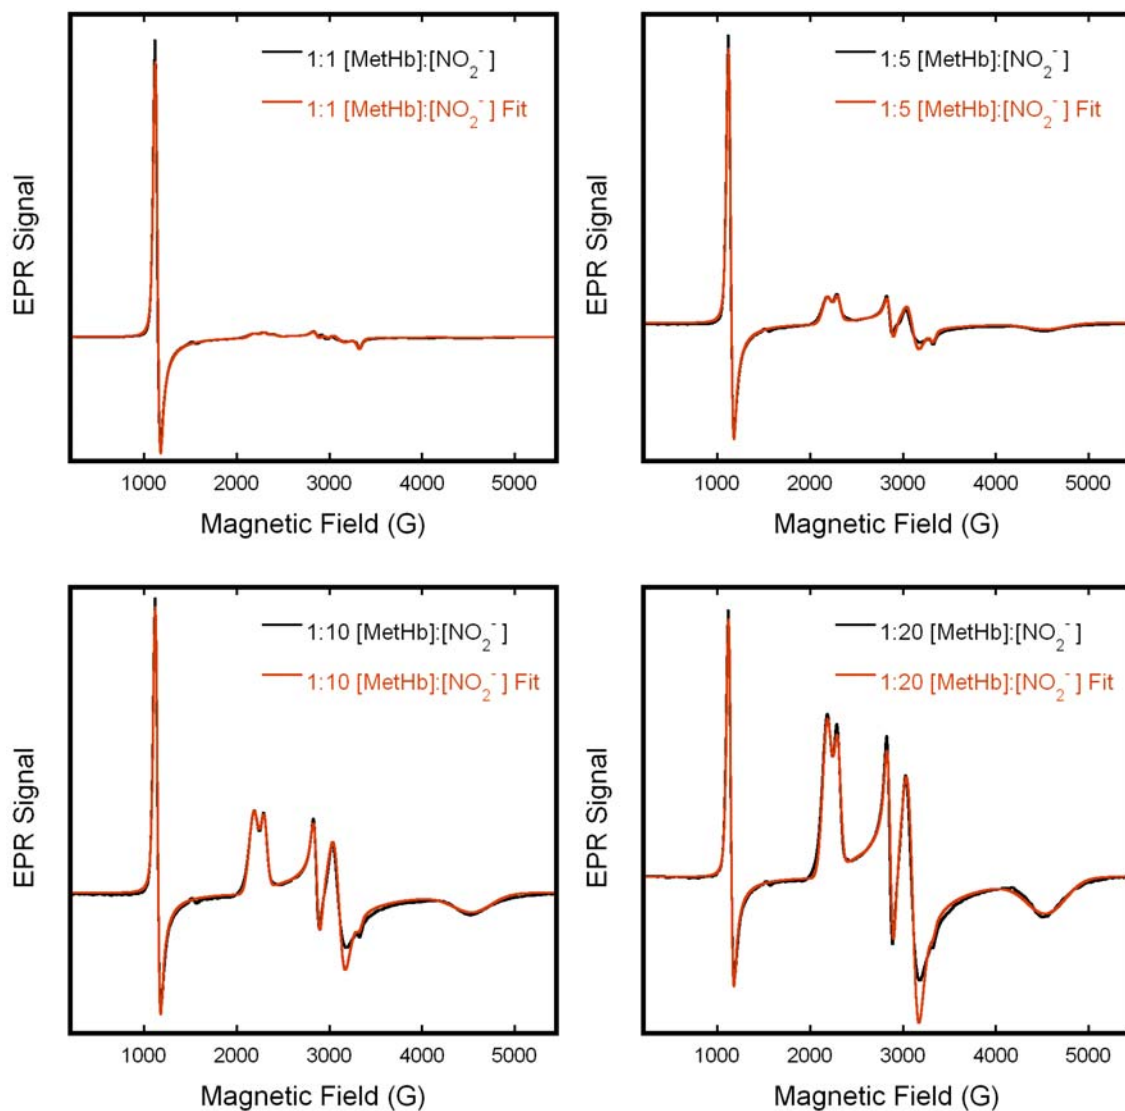

Supplementary Figure 3

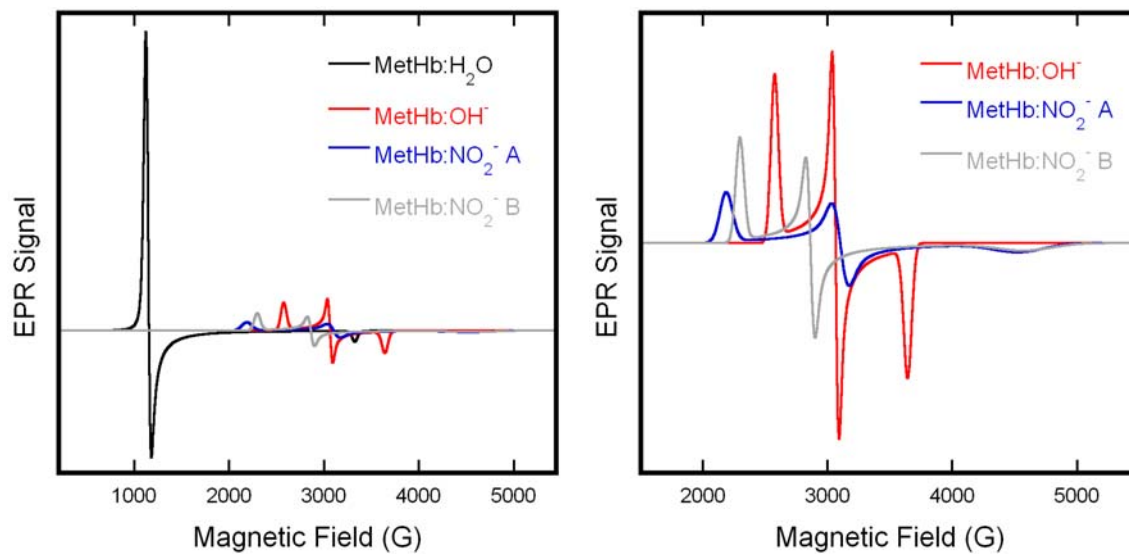

Supplement: NIHMS221986-supplement-1_si_001.pdf [file NIHMS221986-supplement-1_si_001.pdf]
